# Supplementary material
Source: Springer Nature journal article supplement (https://www.springermedizin.de/resource/supplementary/12936_2010_1277_MOESM1_ESM.pdf/9549388)

rainfall air temperature small-sized pool medium-sized pool large-sized pool

Lyanaginga

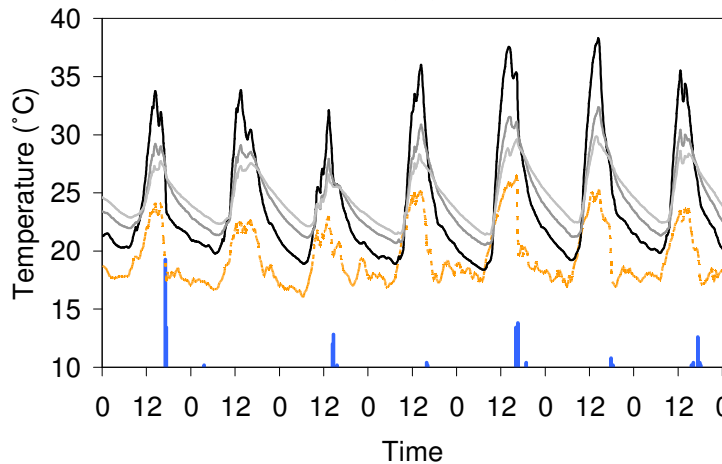

Fort Ternan

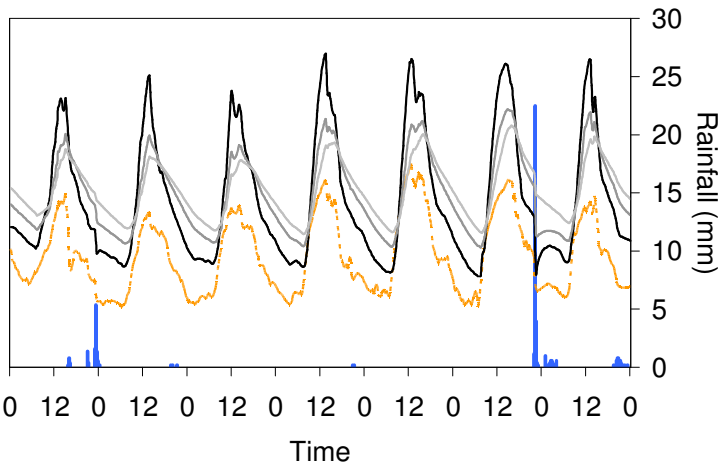

Supplement: MOESM1 [file 9549388]
